# Supplementary material for: Mercury speciation in environmental samples associated with artisanal small-scale gold mines using a novel solid-phase extraction approach to sample collection and preservation
Source: Springer Nature journal article supplement (doi:10.1007/s10653-024-02187-w), 2024-10-28

**Supplementary Information**

Supplementary Figure 1a: Flow chart of samples along river at Rosterman mine, Kenya, with arrows depicting the direction of river flow
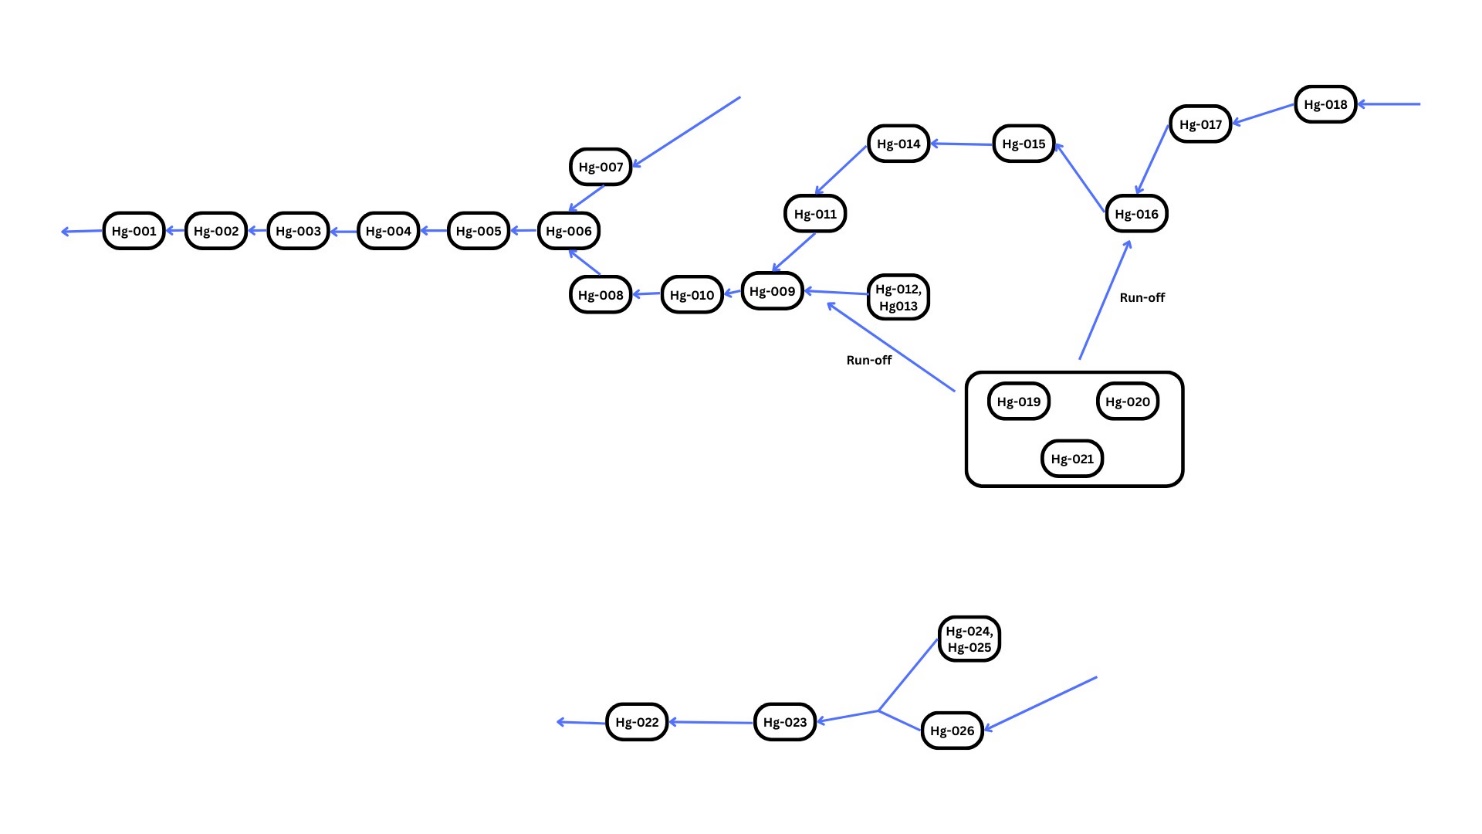


Supplementary Figure 1b: Flow chart of samples along river at Malinya mine, with arrows depicting the direction of river flow
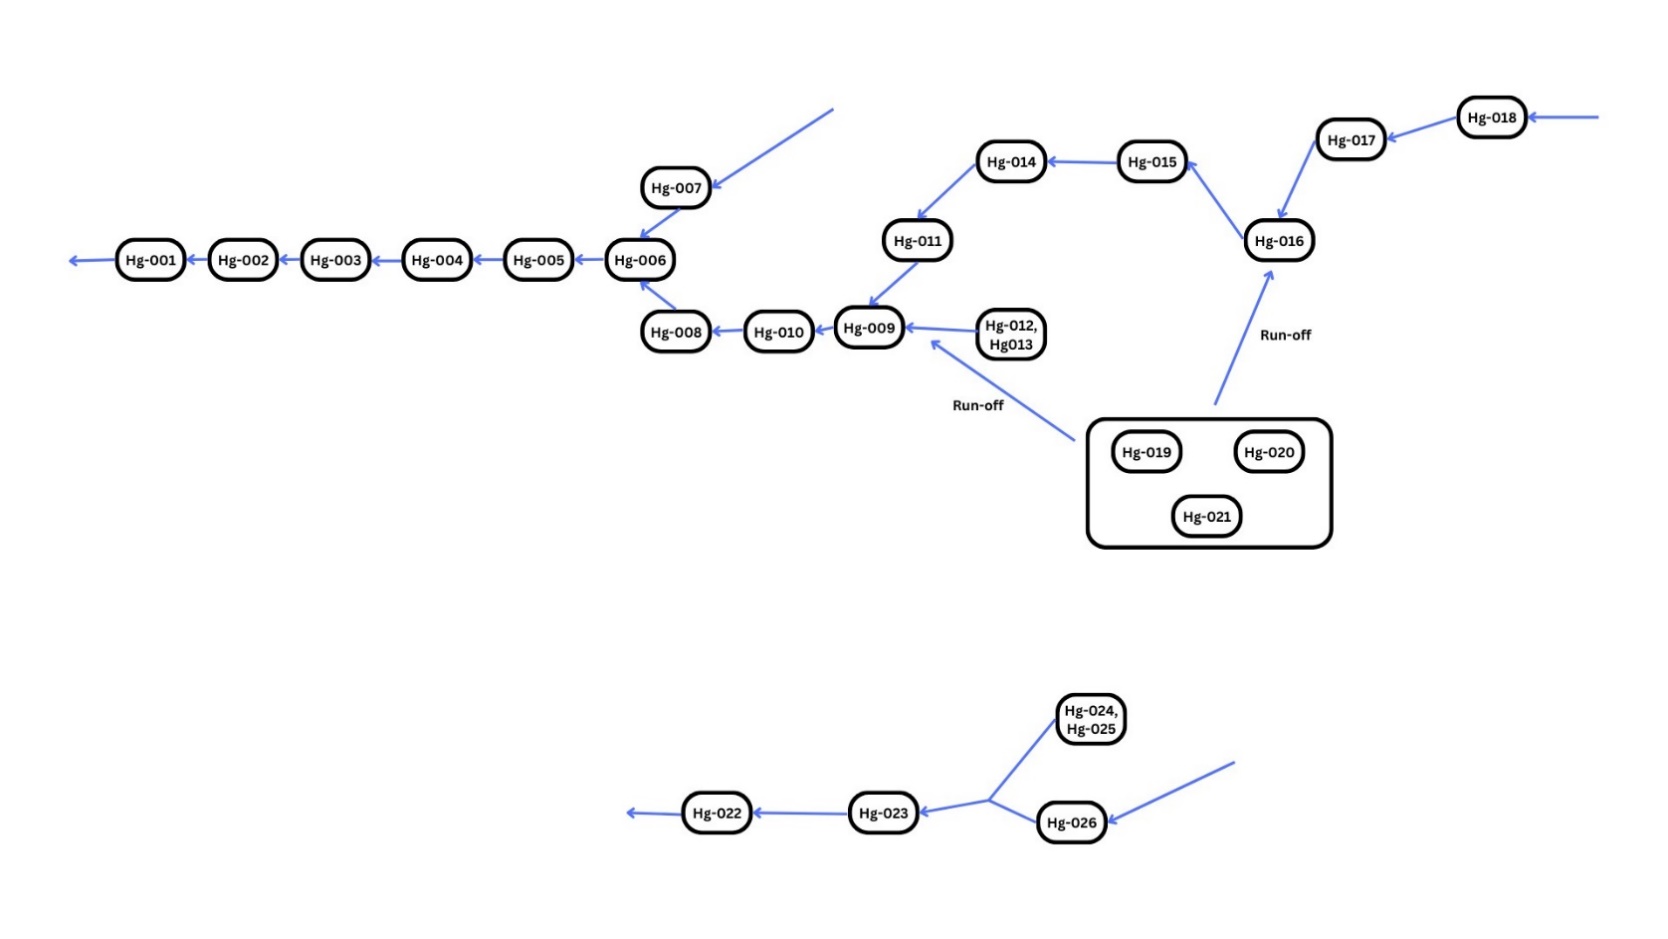

Supplement: MOESM1 [file 10653_2024_2187_MOESM1_ESM.docx]
