# Supplementary material for: Mercury speciation in environmental samples associated with artisanal small-scale gold mines using a novel solid-phase extraction approach to sample collection and preservation
Source: Springer Nature journal article supplement (doi:10.1007/s10653-024-02187-w), 2024-10-28
Supplement: MOESM2 [file 10653_2024_2187_MOESM2_ESM.xlsx]

## Sheet: Table of Contents
Table of Contents
Worksheet	Supplementary Information
Supplementary Table 1:	HPLC-ICP-MS parameters and conditions used in experimental analysis
Supplementary Table 2:	Limits of detection in HPLC-ICP-MS for MeHg and Hg2+ defined as three times standard deviation (3σ) of nine replicate blanks
Supplementary Table 3:	Comparison of major ion chemistry in a synthetic hardwater recipe (Smith et al. (2002)), and measured concentrations from ASGM sites in Kakamega gold belt, Kenya (Ondayo et al. (2023a) and King et al. (2024))
Supplementary Table 4:	Total Hg data for certified reference materials HR-1 (NRCC, Canada), TH-2 (NRCC, Canada), and PACS-2 (NRCC, Canada), and Isotope dilution-microwave extraction (ID-ME) of MeHg from a certified reference material (ERM-CC58, ERM)
Supplementary Table 5:	General chemistry of water samples from ASGM sites (Rosterman and Malinya sites)
Supplementary Table 6:	General chemistry of sediment samples from ASGM sites (Rosterman and Malinya sites)

## Sheet: Supplementary Table 1
Supplementary Table 1: HPLC-ICP-MS parameters and conditions used in experimental analysis
Parameter	Value
HPLC
HPLC pump	Agilent Infinity 1290II
HPLC column	Poroshell aqueous C18 [dimensions]
Mobile phase	1% (v/v) 2-mercaptoethanol (in deionised water)
Flow rate	1.5 mL min-1
Injection volume	100 µL
ICP-MS
ICP-MS	Agilent 8900
Nebulizer	MicroMist 100µm
Isotope	201Hg for water analysis, 199Hg, 201Hg, for sediment isotope dilution analysis
RF Power	1550W
Replicates	3
Plasma gas flow rate	15 L min-1
Auxiliary gas flow rate	0.9 L min-1
Nebulizer gas flow rate	1.00 L min-1
Makeup Gas	0.2 L min-1
Dwell time	100 ms

## Sheet: Supplementary Table 2
Supplementary Table 2: limits of detection in HPLC-ICP-MS for MeHg and Hg2+ defined as three times standard deviation (3σ) of nine replicate blanks
Blank	MeHg199	Hg2+ 199
	µg/L	µg/L
1	0.001	0.001
2	0.006	-0.003
3	0.002	0.002
4	0.004	0
5	0	0.003
6	0	0.013
7	0.005	0
8	0	0.027
9	0.002	0.011
Standard deviation	0.002	0.009
Detection limit. (3σ)	0.007	0.027

## Sheet: Supplementary Table 3
Supplementary Table 3: Comparison of major ion chemistry in a synthetic hardwater recipe (Smith et al. (2002)), and measured concentrations from ASGM sites in Kakamega gold belt, Kenya (Ondayo et al. (2023a) and King et al. (2024))
Ion	Synthetic matrix (mg/L) (Smith et al. (2002))	Natural water (mg/L) (Ondayo et al. (2023a))
Sodium	5.75	7.72
Magnesium	1.46	6.64
Calcium	10.6	12.5
Potassium	0.98	1.87
Chloride	9.93	2.98
Carbonate	23.5	73.5
Sulphate	11	9.39
N.B. A synthetic matrix was used throughout developmental experiments, to take into consideration the ionic characteristics of natural water samples. This matrix was created following Smith et al. (2002), and ionic concentrations are shown in Supplementary Table 1 alongside major ion chemistry from experimental data at ASGM sites in Kenya (Ondayo et al 2023a).

## Sheet: Supplementary Table 4
Supplementary Table 4: Total Hg data for certified reference materials HR-1 (NRCC, Canada), TH-2 (NRCC, Canada), and PACS-2 (NRCC, Canada), and Isotope dilution-microwave extraction (ID-ME) of MeHg from a certified reference material (ERM-CC58, ERM)
CRM	HR-1	TH-2	PACS-2	ERM-CC58
	(Total Hg)	(Total Hg)	(Total Hg)	(MeHg by ID-ME)
	mg kg-1	mg kg-1	mg kg-1	µg kg-1
n	6	5	3	6
Target value	0.261	0.542	2.62	75
	0.259395	0.480225	2.63635	44.4862
	0.270605	0.498915	2.47932	59.5284
	0.242925	0.499725	2.45193	57.0848
	0.281195	0.4507		69.5186
	0.2172	0.4833		63.256
	0.23607			68.2423
Recovery (%)	0.889765	0.962592	0.963607	0.836891
Relative standard deviation (%)	0.0412261	0.0941394	0.0394505	0.137752

## Sheet: Supplementary Table 5
Supplementary Table 5: General chemistry of water samples from ASGM sites (Rosterman and Malinya sites)
Sample Code	Comments	Date Sampled	Field pH	Field Conductivity	Ca	Mg	Na	K	Cl-	SO42-	NO3-	Cat1	Cat2	Br-	NO2-	HPO42-	F-	NPOC	Total P	Total S	Si	SiO2	Ba	Sr	Mn	Fe	Li	Be	B	Al	Ti	V	Cr	Co	Ni	Cu	Zn	Ga	As	Se	Rb	Y	Zr	Nb	Mo	Ag	Cd	Sn	Sb
				µS cm-1	mg l-1	mg l-1	mg l-1	mg l-1	mg l-1	mg l-1	mg l-1	meq l-1	meq l-1	mg l-1	mg l-1	mg l-1	mg l-1	mg l-1	mg l-1	mg l-1	mg l-1	mg l-1	µg l-1	µg l-1	µg l-1	µg l-1	µg l-1	µg l-1	µg l-1	µg l-1	µg l-1	µg l-1	µg l-1	µg l-1	µg l-1	µg l-1	µg l-1	µg l-1	µg l-1	µg l-1	µg l-1	µg l-1	µg l-1	µg l-1	µg l-1	µg l-1	µg l-1	µg l-1	µg l-1
Detection limit					0.3	0.003	0.4	0.04										0.5	0.005	0.03	0.042		0.05	0.2	0.2	0.4	7	0.08	53	0.6	0.06	0.02	0.04	0.006	0.01	0.05	0.2	0.04	0.04	0.07	0.05	0.006	0.009	0.01	0.2	0.04	0.005	0.08	0.04
Hg_001	River Waters	2023-02-02	7.8	110	12.4	7.176	8.6	1.53	5.10437	2.10968	6.18233	1.62251	0.00526166	0.0254197	0.0187054	<0.01	0.0909367	2.324	0.005	0.84	18.21	38.9567	48.4	111.6	97.4	37.4	<7	<0.08	<53	17.1	0.45	1.26	0.4	0.318	1.39	0.85	191.8	<0.04	0.64	0.08	3.42	0.047	0.065	0.01	0.5	<0.04	0.006	<0.08	<0.04
Hg_002	River Waters	2023-02-02	7.6	110	12.2	7.358	8.3	1.53	4.91374	2.12982	6.38475	1.61446	0.00359768	0.0246093	0.0205566	<0.01	0.161003	1.855	<0.005	0.82	18.76	40.1333	47.68	110	94.6	7.3	<7	<0.08	<53	2.9	0.08	1.19	0.29	0.346	1.41	0.81	0.7	<0.04	0.61	<0.07	3.38	0.034	0.033	<0.01	0.5	<0.04	<0.005	<0.08	<0.04
Hg_003	River Waters	2023-02-02	7.2	160	18.3	10.09	8.4	1.96	5.22561	0.768633	0.0772729	2.15901	0.0684718	0.0445854	0.0195119	<0.01	0.348573	3.489	<0.005	0.33	13.52	28.9233	194.22	177.1	5181.4	1146.7	<7	<0.08	<53	0.8	<0.06	0.07	0.2	13.708	4.34	0.18	1.2	<0.04	2.23	0.08	7.39	0.028	0.031	<0.01	1.6	<0.04	<0.005	<0.08	<0.04
Hg_004	River Waters	2023-02-02	7.6	120	12.1	7.284	8.2	1.48	4.79148	1.9771	6.26045	1.59775	0.00359365	0.0241276	0.0202576	<0.01	0.155015	2.615	<0.005	0.8	18.32	39.192	47.92	109.2	109.1	7.5	<7	<0.08	<53	8.4	0.07	1.23	0.31	0.381	1.39	0.72	0.6	<0.04	0.51	<0.07	3.25	0.028	0.032	<0.01	0.5	<0.04	<0.005	<0.08	<0.04
Hg_005	River Waters	2023-02-02	7.5	120	12.3	7.437	8.8	1.51	5.06569	2.03213	6.42356	1.64719	0.0035345	0.0234905	0.0229061	<0.01	0.14371	2.236	<0.005	0.8	18.36	39.2775	47.63	111.5	69.3	5.5	<7	<0.08	<53	3.6	0.13	1.14	0.35	0.25	1.46	0.96	0.8	<0.04	0.55	0.08	3.52	0.028	0.064	<0.01	0.5	<0.04	<0.005	<0.08	<0.04
Hg_006	River Waters	2023-02-02	7.5	110	10.8	5.976	8.6	1.38	5.44664	2.04194	7.86374	1.44009	0.00341481	0.0233001	0.0259086	<0.01	0.173893	2.843	<0.005	0.74	22.28	47.6636	42.61	102.4	49	8.5	<7	<0.08	<53	4.3	0.1	1	0.37	0.193	1.24	0.81	1.1	<0.04	0.21	0.08	3.06	0.025	0.057	<0.01	0.4	<0.04	<0.005	<0.08	<0.04
Hg_007	River Waters	2023-02-02	7.6	110	10.9	5.853	8.8	2.58	7.31796	2.19715	8.58138	1.47435	0.00352977	0.0257138	0.0269287	<0.01	0.161361	2.582	<0.005	0.78	19.24	41.1601	42.61	103.2	40.7	10.3	<7	<0.08	<53	6	0.14	1	0.37	0.159	1.09	0.72	1.7	<0.04	0.14	<0.07	2.89	0.024	0.047	<0.01	0.4	<0.04	<0.005	<0.08	<0.04
Hg_008	River Waters	2023-02-02	7.7	170	18.6	14.627	7	2.28	4.2158	2.31247	0.93085	2.49462	0.00517189	0.0427898	0.018393	<0.01	0.295689	2.838	<0.005	0.85	15.63	33.4373	67.39	144.5	137.4	16.6	<7	<0.08	<53	8.1	0.32	1.7	0.41	0.403	2.69	1.02	0.7	<0.04	2.13	0.1	5.17	0.046	0.053	<0.01	0.9	<0.04	<0.005	<0.08	<0.04
Hg_009	River Waters	2023-02-02	7.3	180	17.9	15.465	6.7	2.65	3.34698	1.05764	1.16027	2.52506	0.00447249	0.0361772	0.0144078	<0.01	0.279736	2.756	<0.005	0.49	15.58	33.3303	63.74	140.9	218.8	6.1	<7	<0.08	<53	2.2	0.08	1.72	0.41	0.613	3.31	0.82	1.1	<0.04	1.34	0.08	5.17	0.057	0.039	<0.01	1	<0.04	<0.005	<0.08	<0.04
Hg_010	River Waters	2023-02-02	7.6	180	18.3	14.736	6.8	2.21	3.82161	1.97722	0.861686	2.47813	0.00503265	0.0366559	0.0449305	<0.01	0.276309	2.821	<0.005	0.78	16.02	34.2716	65.75	141.8	174.5	15.6	<7	<0.08	<53	5.4	0.28	1.68	0.39	0.505	2.98	1.27	1.8	<0.04	2.04	0.11	5.26	0.051	0.051	<0.01	0.9	<0.04	<0.005	<0.08	<0.04
Hg_011	River Waters	2023-02-02	7.6	160	19.3	16.252	7.4	1.9	3.4993	1.11323	1.32855	2.67095	0.00467269	0.0380057	0.0153258	<0.01	0.278912	3.09	<0.005	0.48	15.77	33.7368	65.37	149.1	216.8	5.9	<7	<0.08	<53	3.2	<0.06	1.44	0.46	0.659	3.7	1.11	1.7	<0.04	1.1	0.08	5.72	0.067	0.046	<0.01	1	<0.04	<0.005	<0.08	<0.04
Hg_012	Drinking water pond	2023-02-02	7.2	180	14	9.304	7	9.71	5.74131	4.99501	0.128593	2.01711	0.00837421	0.0363043	0.0610298	<0.01	0.207349	5.264	0.106	1.76	23.03	49.2681	70.04	110.6	152.7	89.9	<7	<0.08	<53	2.3	0.07	5.39	0.39	1.56	2.73	0.37	1.6	<0.04	0.76	0.3	12.15	0.034	0.009	<0.01	0.2	<0.04	<0.005	<0.08	<0.04
Hg_013	Drinking water reservoir	2023-02-02	6.9	210	15.6	12.706	8.7	3.1	5.90846	1.52847	6.52556	2.28176	0.00347255	0.0246845	0.396183	<0.01	0.228313	10.2	0.076	0.64	34.7	74.2337	35.25	122.8	11.8	2.9	<7	<0.08	<53	0.7	<0.06	11.92	2.07	0.129	3.26	0.12	3.3	<0.04	0.86	<0.07	0.46	0.007	<0.009	<0.01	<0.2	<0.04	<0.005	<0.08	<0.04
Hg_014	River Waters	2023-02-02	7.6	180	17.9	14.921	6.8	1.54	3.34213	1.28933	1.33711	2.45625	0.00431869	0.0368708	0.014523	<0.01	0.271505	4.817	<0.005	0.56	15.82	33.8437	60.86	140	235.4	4.4	<7	<0.08	<53	2.1	<0.06	1.48	0.5	0.727	3.4	0.78	0.6	<0.04	1.08	0.08	5.28	0.046	0.036	<0.01	1	<0.04	<0.005	<0.08	<0.04
Hg_015	River Waters	2023-02-02	7.4	170	18.4	15.145	6.7	2.99	3.55749	1.61741	1.52217	2.53238	0.00443288	0.0388432	0.0165626	<0.01	0.294041	2.843	<0.005	0.62	15.7	33.587	61.37	143.5	259.6	4.9	<7	<0.08	<53	1.5	<0.06	1.1	0.53	0.77	3.52	0.79	0.7	<0.04	0.8	0.08	5.22	0.063	0.036	<0.01	1	<0.04	<0.005	<0.08	<0.04
Hg_016	River Waters	2023-02-02	7.5	170	18.2	15.187	6.6	1.51	3.37469	1.26163	1.47066	2.48364	0.00439265	0.0356288	0.0140007	<0.01	0.275555	2.461	<0.005	0.52	15.46	33.0736	56.31	141.2	236.6	6.5	<7	<0.08	<53	1.8	0.07	0.92	0.56	0.632	3.39	0.72	0.8	<0.04	0.49	0.08	5.35	0.063	0.035	<0.01	1	<0.04	<0.005	<0.08	<0.04
Hg_017	River Waters	2023-02-02	7	190	18.4	16.083	7.1	1.56	3.37783	1.10263	1.28696	2.59038	0.00442213	0.0366804	0.0136717	<0.01	0.248713	2.685	<0.005	0.47	14.89	31.8542	51.62	143.6	147	7.3	<7	<0.08	<53	2.4	0.06	0.83	0.75	0.403	3.15	0.69	0.5	<0.04	0.32	0.08	5.44	0.061	0.036	<0.01	1	<0.04	0.006	<0.08	<0.04
Hg_018	River Waters	2023-02-02	7.6	180	19.4	16.01	6.9	1.67	3.38771	1.2068	1.15084	2.62839	0.00454522	0.0401672	0.0108009	<0.01	0.260386	2.54	<0.005	0.51	15.62	33.4159	51.8	147.7	260.1	7.8	<7	<0.08	<53	2.8	<0.06	1.09	0.43	0.582	2.94	0.69	1.4	<0.04	0.37	0.09	5.81	0.045	0.039	<0.01	1	<0.04	<0.005	<0.08	<0.04
Hg_019	Ore washing pond	2023-02-02	7.4	410	45.5	17.938	13.4	4.33	13.4388	124.956	2.75192	4.44023	0.00854453	0.103437	0.0122217	<0.01	0.164161	8.926	<0.005	42.5	19.97	42.7218	96.15	307.3	2974.7	2.4	<7	<0.08	<53	6.2	<0.06	1.62	0.09	10.982	16.97	0.39	1.6	<0.04	10.4	0.14	3.01	0.083	<0.009	<0.01	0.8	<0.04	0.09	<0.08	0.49
Hg_020	Mine drinking water	2023-02-02	7.3	300	30.4	13.364	8.4	1.09	9.53506	7.83247	5.85132	3.00997	0.00580251	0.0510008	0.0735449	<0.01	0.211218	12.41	0.02	2.73	27.83	59.5367	68.35	202.1	174.9	3.6	<7	<0.08	<53	2.7	<0.06	5.29	1.54	1.281	2.77	1.61	9.4	<0.04	1.51	0.1	0.98	0.029	0.009	<0.01	0.4	<0.04	0.012	<0.08	0.06
Hg_021	Ore washing pond	2023-02-02	8	1100	135.9	70.198	48.8	14.48	40.8886	534.682	0.0384902	15.0512	0.0290672	0.52062	0.0104584	<0.01	0.708503	16.83	0.019	193.85	13.32	28.4955	223.68	1128.9	688.7	0.7	<7	<0.08	<53	8.8	<0.06	4.5	0.56	1.539	7.65	5.5	0.9	<0.04	11.21	0.66	1.57	0.044	0.029	<0.01	7.3	<0.04	0.011	<0.08	1.5
Hg_022	River Waters	2023-02-03	7.5	120	11.9	7.084	8.6	2.57	5.72057	1.20631	7.4149	1.61659	0.00601354	0.0357764	0.0412677	<0.01	0.153874	5.341	<0.005	0.52	21.54	46.0805	96.37	125	427.2	32.7	<7	<0.08	<53	7.7	0.1	2.95	0.19	1.309	1.57	0.44	1.9	<0.04	3.38	0.09	3.27	0.044	0.043	<0.01	0.3	<0.04	<0.005	<0.08	<0.04
Hg_023	River Waters	2023-02-03	7	130	8.6	6.319	11.1	1.38	5.16355	2.69951	0.0505349	1.46728	0.0127414	0.0496901	0.0108683	<0.01	0.201812	7.139	<0.005	1.05	12.44	26.6129	183.08	102.5	1004.8	144	<7	<0.08	<53	5.8	0.28	0.25	0.22	3.747	10.59	0.68	3.8	<0.04	5.42	<0.07	7.75	0.07	0.039	<0.01	0.2	<0.04	0.007	<0.08	<0.04
Hg_024	Spring drinking water	2023-02-03	6.4	130	11.7	6.386	8.8	1.98	5.5767	2.84436	6.06227	1.54278	0.10714	0.0413043	0.0234762	<0.01	0.0430231	10.25	0.005	1.09	22.83	48.8402	114.6	149.3	771.4	1899.9	<7	<0.08	<53	1.6	0.07	0.4	0.87	6.061	17.58	0.23	6.7	<0.04	0.59	0.17	3.1	0.098	0.016	<0.01	<0.2	<0.04	0.032	<0.08	<0.04
Hg_025	Drinking water pond	2023-02-03	6.5	120	11.5	6.237	8.8	2.16	5.93541	2.89516	4.94577	1.52515	0.0722309	0.0405156	0.0646914	<0.01	0.0486394	7.3	<0.005	1.04	22.64	48.4338	117.23	145.2	840.8	1251.1	<7	<0.08	<53	1.1	<0.06	0.34	0.12	7.76	15.87	0.27	8.7	<0.04	1.98	0.15	3.41	0.088	0.016	<0.01	<0.2	<0.04	0.016	<0.08	<0.04
Hg_026	River Waters	2023-02-03	7.5	180	12.2	7.17	8.4	2.24	6.34154	0.96811	7.68525	1.6215	0.00949159	0.0364088	0.0168091	<0.01	0.14433	11.68	0.01	0.42	23.07	49.3537	66.02	129.4	168.6	103.8	<7	<0.08	<53	18	0.54	2.72	0.4	0.713	1.45	0.44	10.9	<0.04	1.98	0.08	2.11	0.042	0.08	0.01	0.3	<0.04	<0.005	<0.08	<0.04
[truncated: 23 more columns]

## Sheet: Supplementary Table 6
Supplementary Table 6: General chemistry of sediment samples from ASGM sites (Rosterman and Malinya sites)
Sample Code	Hg	Li	Be	Na	Mg	Al	P	K	Ca	Ti	V	Cr	Mn	Fe	Co	Ni	Cu	Zn	Ga	As	Rb	Sr	Y	Mo	Cd	Sb	Cs	Ba	La	Ce	Pr	Nd	Sm	Eu	Gd	Tb	Dy	Ho	Tm	Yb	Lu	Tl	Pb	Th	U
	mg kg-1	mg kg-1	mg kg-1	mg kg-1	mg kg-1	mg kg-1	mg kg-1	mg kg-1	mg kg-1	mg kg-1	mg kg-1	mg kg-1	mg kg-1	mg kg-1	mg kg-1	mg kg-1	mg kg-1	mg kg-1	mg kg-1	mg kg-1	mg kg-1	mg kg-1	mg kg-1	mg kg-1	mg kg-1	mg kg-1	mg kg-1	mg kg-1	mg kg-1	mg kg-1	mg kg-1	mg kg-1	mg kg-1	mg kg-1	mg kg-1	mg kg-1	mg kg-1	mg kg-1	mg kg-1	mg kg-1	mg kg-1	mg kg-1	mg kg-1	mg kg-1	mg kg-1
Detection limit	0.02	0.3	0.002	17	27	78	0.4	50	596	6	0.3	0.6	3	80	0.05	0.3	0.2	0.9	0.03	0.07	0.2	0.5	0.03	0.2	0.007	0.02	0.02	0.8	0.05	0.09	0.02	0.05	0.02	0.02	0.02	0.02	0.02	0.02	0.02	0.01	0.02	0.006	0.06	0.02	0.02
Hg_001	0.08555	11.9	2.28	4484	13218	57909	502.3	11929	11443	3768	178.3	1365	1685	77039	72.59	196.3	55	80.6	14.48	10.65	52.6	129.8	15.43	2.7	0.067	0.6	1.89	478.2	24.5	83.85	5.26	20.36	3.85	0.84	3.33	0.48	2.8	0.57	0.24	1.67	0.26	0.374	15.93	5.24	1.57
Hg_002	0.1065	16.5	1.931	4309	10822	83643	529.6	12889	8824	4919	173.3	747	2145	77206	78.17	216.1	77.5	99	18.95	13.6	67.5	107.8	23.28	3.1	0.116	0.5	2.65	532	39.94	134.34	8.32	31.96	5.69	1.16	4.83	0.71	4.19	0.84	0.34	2.36	0.34	0.446	21.82	7.78	2.08
Hg_003	0.07561	15.8	2.454	4287	10874	79255	521.5	12545	8953	4503	193.2	944.6	1930	85492	75.07	204	71.9	87.6	18.54	18.1	65.4	108.7	22.45	3.6	0.095	0.55	2.53	570	36.78	118.02	7.79	31.07	5.69	1.19	4.78	0.7	4.07	0.82	0.35	2.41	0.34	0.442	22.09	7.16	1.8
Hg_004	0.25719	13	2.065	7350	13458	84549	611.4	13766	15352	5108	190.9	656.9	1723	79573	62.07	145.5	90.8	98.9	17.84	16.08	65.6	165.4	21.94	2.9	0.077	0.57	2.64	599.6	34.32	87.85	7.61	29.81	5.49	1.2	4.58	0.67	3.92	0.79	0.33	2.22	0.31	0.391	16.35	7.35	1.78
Hg_004 Duplicate	0.293085	14.8	2.211	7209	14386	83436	552.2	12943	15754	5092	196.7	807.5	1809	81083	63.39	151.3	88.1	94.8	18.56	12.89	61.7	163	20.98	2.4	0.097	0.55	2.51	578.8	33.43	88.42	7.37	29.28	5.5	1.23	4.47	0.64	3.75	0.78	0.32	2.19	0.31	0.401	15.45	6.39	1.75
Hg_005	0.08981	12.2	2.377	3870	13186	50140	483.4	10563	10687	2803	197.1	1710.2	2321	89425	70.99	202.5	63.5	86.4	12.27	17.16	47.5	120.4	13.86	3.4	0.094	0.69	1.75	451.3	21.24	98.43	4.56	17.54	3.39	0.74	2.91	0.44	2.62	0.52	0.21	1.5	0.22	0.324	20.2	4.29	1.47
Hg_006	0.10706	14	1.834	3078	12429	57665	496.1	8991	8679	3585	201.8	1830.7	3188	90253	81.68	237	76.4	84.7	13.89	12.03	47.2	91.5	15.79	4	0.096	0.42	2.03	499.1	25.22	111.76	5.27	20.39	3.87	0.83	3.3	0.49	2.92	0.57	0.24	1.71	0.24	0.381	22.37	5.28	1.73
Hg_007	0.11155	12	2.463	2665	10877	52749	442.2	10153	7621	2851	203.6	1940	3098	95659	85.46	230.1	63.8	80.6	14.43	7.94	47.2	88.6	13.92	3.7	0.109	0.39	1.86	542.7	22.3	91.49	4.77	18.68	3.6	0.75	2.97	0.44	2.59	0.53	0.23	1.62	0.21	0.383	17.68	4.65	1.56
Hg_008	0.24941	12.4	1.654	7099	14018	68699	716.1	11296	13110	4058	194.4	1272.3	2080	86965	65.78	209.4	76.8	92.4	17	51.18	57.1	174.1	18.12	2.8	0.074	1.05	2.3	497.5	29.92	96.43	6.43	25.34	4.59	1.01	3.9	0.58	3.37	0.66	0.29	1.94	0.28	0.346	31.35	5.83	1.9
Hg_009	1.06486	16.7	1.94	5725	17529	77752	647.9	11805	12680	5176	170.1	781.3	1762	75395	67.31	249.5	94.6	108.7	16.77	32.97	63.5	149.3	21.77	2.2	0.112	1.16	2.74	511.8	34.64	91.27	7.42	29.11	5.63	1.16	4.62	0.66	3.89	0.76	0.32	2.28	0.3	0.407	43.38	6.48	1.79
Hg_010	0.32496	12.6	2.27	6754	14892	66102	672.9	11242	12624	4338	161.2	798.3	1534	71221	55.53	201.9	92	104.2	14.71	52.09	54.2	167.7	17.52	3	0.115	3.29	2.32	490.4	28.69	78.18	6.47	25.54	4.8	1.03	3.92	0.57	3.23	0.64	0.26	1.86	0.26	0.365	41.51	43.87	3.99
Hg_011	0.13774	13.9	2.356	6887	19367	70131	728.1	11923	13236	4185	176.9	1196.3	1335	79374	68.82	300	56.9	84.2	15.83	21.52	58.8	170.1	19.33	1.9	0.085	4.76	2.67	496.6	31.42	117.54	6.61	26.33	4.99	1.07	4.06	0.63	3.45	0.71	0.31	2.02	0.29	0.4	23.98	5.86	1.61
Hg_011 Duplicate	0.195955
Hg_012	0.378515	16.5	2.935	4347	8121	89331	764.9	13773	6058	6677	203.1	482.1	1066	78243	60.67	161.5	72.9	117.2	21.18	10.42	79.3	103.5	24.24	2.7	0.165	0.84	2.83	511.5	44.88	136.61	9.06	34.54	6.12	1.21	5.09	0.74	4.36	0.91	0.39	2.6	0.4	0.488	29.49	9.9	2.69
Hg_012 Duplicate		21.1	2.05	4419	8394	92397	767.6	14099	6347	7102	214.1	504.7	1125	81967	62.81	164.8	75.8	120.8	20.61	11.55	82.8	104.8	25.05	2.9	0.126	0.83	2.81	527.6	46.87	143.42	9.55	35.91	6.49	1.24	5.18	0.75	4.45	0.9	0.39	2.72	0.39	0.486	30.41	10.58	2.78
Hg_014	0.516925	16.2	1.852	7387	21617	72108	574.5	12600	14160	4665	153.8	864.6	1461	65675	60.81	271.8	62.6	87.4	16.6	40.01	59.3	180.4	18.96	1.8	0.097	5.07	2.73	520.1	31.24	82.93	6.74	26.01	5.03	1.1	4.21	0.57	3.39	0.67	0.28	1.97	0.28	0.369	21.21	5.86	1.53
Hg_015	1.7185	11.5	1.115	9079	19980	62434	545.2	13068	16431	3978	149.9	680.9	1020	59177	49.86	187.1	47.8	73.6	13.79	77.4	54.4	207.8	16.34	1.3	0.077	0.56	2.09	538.9	27.89	72.93	6.25	24.68	4.58	1.05	3.75	0.53	3.01	0.57	0.25	1.64	0.23	0.295	24.81	4.72	1.25
Hg_016	0.721435	11.6	1.543	9133	15801	61140	571.9	11808	16709	4268	159.8	588.2	1042	59999	44.71	150.7	69.2	71.7	13.01	69.37	49.8	194	16.56	1.4	0.078	0.84	1.98	505.6	27.09	73.24	5.96	23.63	4.47	0.99	3.59	0.52	2.89	0.6	0.24	1.66	0.23	0.28	33.72	4.69	1.26
Hg_017	1.00765	20	2.134	3813	16674	89881	635.8	11703	9153	5580	171.6	1006.7	3213	82270	78.41	345.4	69.1	94.2	20.72	16.04	62.9	116.7	29.62	2.9	0.087	0.45	3.38	497	48.18	134.76	10.13	39.16	7.32	1.48	6.14	0.9	5.25	1.05	0.43	2.96	0.42	0.517	18.73	8.38	2.29
Hg_018	0.081585	19.1	1.924	3433	19168	92550	690.1	11077	9594	5867	167.9	941.6	2513	81038	74.18	357.7	75.9	102.3	20.22	8.18	66.7	106	27.5	2.8	0.12	0.48	3.65	498.1	44.51	100.14	9.21	35.71	6.67	1.41	5.68	0.81	4.84	0.98	0.41	2.83	0.42	0.549	16.91	8.44	2.35
Hg_022	0.170125	11.7	1.799	10509	8992	58586	373.4	16760	5151	2958	101.2	294.6	925	43205	43.93	98.7	31.9	87.3	13.2	66.88	62.3	144.7	14.31	2.3	0.104	0.78	1.65	627.3	26.02	60.11	5.66	21.93	3.91	0.86	3.05	0.44	2.56	0.54	0.22	1.56	0.22	0.432	18.54	6.39	1.9
Hg_023	0.169525	15.1	2.529	6887	8359	72194	498.8	13746	3859	3742	123.5	315.5	1066	53355	45.4	112.5	43.3	102.3	17.04	52.17	64.1	106.1	19.54	2.1	0.13	0.79	1.89	560.3	37.18	86.89	7.8	29.93	5.59	1.07	4.22	0.59	3.53	0.7	0.3	1.96	0.28	0.467	31.06	7.86	2.24
Hg_023 Duplicate	0.194275
Hg_025	1.83855	10.8	1.982	8853	3952	64050	497.4	12121	5260	3687	126.7	275.4	445	48751	27.31	64.2	68.1	88.9	14.47	345.09	55.9	133.4	20.44	4.2	0.322	2.08	1.58	435.1	39.9	93.13	8.19	30.93	5.46	1.03	4.22	0.62	3.63	0.74	0.3	2.04	0.28	0.421	38.18	7.35	2.09
Hg_025 Duplicate		11.9	2.274	9170	4102	66397	508	12156	5004	3699	127.6	286.1	456	49016	27.53	66	60.1	93.5	15.29	348.77	57.1	134.8	20.98	3.8	0.307	2.36	1.57	444.3	40.46	95.08	8.4	31.32	5.52	1.09	4.42	0.63	3.64	0.74	0.31	2.19	0.3	0.44	40.36	7.48	2.19
Hg_026	0.377235	11.6	2.123	13949	7833	62471	409.7	18952	7504	2920	100.1	301.3	617	40282	33.05	73.8	29.9	67.3	12.74	28.46	75.4	195.9	12.74	1.6	0.04	0.56	1.8	668.1	24.81	59.74	5.33	19.78	3.49	0.8	2.75	0.39	2.3	0.47	0.2	1.38	0.2	0.439	18.3	7.07	1.87
Duplicate % differences	Hg	Li	Be	Na	Mg	Al	P	K	Ca	Ti	V	Cr	Mn	Fe	Co	Ni	Cu	Zn	Ga	As	Rb	Sr	Y	Mo	Cd	Sb	Cs	Ba	La	Ce	Pr	Nd	Sm	Eu	Gd	Tb	Dy	Ho	Tm	Yb	Lu	Tl	Pb	Th	U
Hg_004 % difference	0.122473	0.121622	0.0660335	0.0195589	0.0645072	0.0133396	0.107208	0.0635865	0.0255173	0.00314218	0.0294865	0.186502	0.0475401	0.0186229	0.0208235	0.0383344	0.030647	0.0432489	0.0387931	0.247479	0.0632091	0.0147239	0.0457579	0.208333	0.206186	0.0363636	0.0517928	0.0359364	0.0266228	0.00644651	0.0325645	0.0181011	0.00181818	0.0243902	0.0246085	0.046875	0.0453333	0.0128205	0.03125	0.0136986	0	0.0249377	0.0582524	0.150235	0.0171429
Hg_011% difference	0.297084
Hg_012% difference		0.121622	0.0660335	0.0195589	0.0645072	0.0133396	0.107208	0.0635865	0.0255173	0.00314218	0.0294865	0.186502	0.0475401	0.0186229	0.0208235	0.0383344	0.030647	0.0432489	0.0387931	0.247479	0.0632091	0.0147239	0.0457579	0.208333	0.206186	0.0363636	0.0517928	0.0359364	0.0266228	0.00644651	0.0325645	0.0181011	0.00181818	0.0243902	0.0246085	0.046875	0.0453333	0.0128205	0.03125	0.0136986	0	0.0249377	0.0582524	0.150235	0.0171429
Hg_023% difference	0.127397
Hg_025% difference		0.092437	0.128408	0.0345692	0.0365675	0.035348	0.0208661	0.00287924	0.0511591	0.00324412	0.00705329	0.0373995	0.0241228	0.0054064	0.00799128	0.0272727	0.133111	0.0491979	0.0536298	0.0105514	0.0210158	0.0103858	0.0257388	0.105263	0.0488599	0.118644	0.00636943	0.0207067	0.0138408	0.020509	0.025	0.0124521	0.0108696	0.0550459	0.0452489	0.015873	0.00274725	0	0.0322581	0.0684932	0.0666667	0.0431818	0.0540139	0.0173797	0.0456621
Certified Reference Material recoveries and standard deviation
BCR-2 (n43)		Li	Be	Na	Mg	Al	P	K	Ca	Ti	V	Cr	Mn	Fe	Co	Ni	Cu	Zn	Ga	As	Rb	Sr	Y	Mo	Cd	Sb	Cs	Ba	La	Ce	Pr	Nd	Sm	Eu	Gd	Tb	Dy	Ho	Tm	Yb	Lu	Tl	Pb	Th	U
Recovery (%)		0.820344		0.987759	0.926225	0.923709	0.967587	0.951322	0.964147	0.986227	1.02055	0.886471	0.976003	0.980157	1.01156		0.867639	1.07904	0.838965		0.952666	0.852337	0.9177	1.02631			1.03369	0.930737	0.968774	0.959518	0.950697	1.01472	1.00242	0.959494	0.980377	0.9761	0.917132	0.938353	0.924521	0.952981	0.968974		0.876776	0.876419	0.944116
Relative standard deviation (%)		0.093205		0.0471427	0.0639597	0.0516338	0.0671394	0.0119301	0.0204447	0.0115053	0.015674	0.0362516	0.015272	0.0249187	0.0224097		0.0112457	0.0141329	0.0589318		0.0246452	0.0532582	0.027692	0.0279513			0.0336454	0.0399488	0.0446741	0.0501694	0.0471967	0.0442313	0.0557509	0.0573517	0.0566721	0.050294	0.0596593	0.0210477	0.0224782	0.0257925	0.0504526		0.0284863	0.0198012	0.0320782
LKSD-1 (n=1)		Li	Be	Na	Mg	Al	P	K	Ca	Ti	V	Cr	Mn	Fe	Co	Ni	Cu	Zn	Ga	As	Rb	Sr	Y	Mo	Cd	Sb	Cs	Ba	La	Ce	Pr	Nd	Sm	Eu	Gd	Tb	Dy	Ho	Tm	Yb	Lu	Tl	Pb	Th	U
Recovery (%)		0.973354		1.0899	1.02007	0.958511	0.763143	1.00125	0.995536	0.812634	0.984487	0.867347	0.852668	0.957977	0.937899	1.00396	0.929668	1.037		0.822922	0.957646	0.977039	0.99859	1.02881		0.985945	0.449202	0.876722	0.848688	0.933281		1.04525	0.979201	1.00791		0.861705	0.894303			0.922382	0.638846		1.08917	0.835987	0.881973
LKSD-3 (n=1)		Li	Be	Na	Mg	Al	P	K	Ca	Ti	V	Cr	Mn	Fe	Co	Ni	Cu	Zn	Ga	As	Rb	Sr	Y	Mo	Cd	Sb	Cs	Ba	La	Ce	Pr	Nd	Sm	Eu	Gd	Tb	Dy	Ho	Tm	Yb	Lu	Tl	Pb	Th	U
Recovery (%)		0.99302		1.0724	0.997597	0.969713	1.1815	1.01712	1.04153	0.884528	0.972597	0.886559	0.89544	1.00352	1.03186	1.09959	0.933841	0.968646		0.83073	0.960366	0.932439	0.880157			0.891753	0.961441	0.911078	0.880123	0.949136		0.984053	0.987946	0.894635		0.799879	0.935476				0.894968		1.01695	0.87886	0.883082
MESS-4 (n=1)		Li	Be	Na	Mg	Al	P	K	Ca	Ti	V	Cr	Mn	Fe	Co	Ni	Cu	Zn	Ga	As	Rb	Sr	Y	Mo	Cd	Sb	Cs	Ba	La	Ce	Pr	Nd	Sm	Eu	Gd	Tb	Dy	Ho	Tm	Yb	Lu	Tl	Pb	Th	U
Recovery (%)		0.893921	1.10805	1.0129	0.922579	0.91826	0.971652	1.0108	1.01727	0.785128	0.989316	0.990951	0.967563	0.999445	1.01342	0.963757	0.989135	1.03906	0.978826	0.912234		0.885137			1.02593	1.02642	0.784402	0.958779	0.889445	0.842182			0.968809	0.814718						0.816547		0.955668	1.00297	0.803663	0.805723
